# Supplementary material for: Accurate determination of trace silver in geological reference materials by inductively coupled plasma-tandem mass spectrometry (ICP-MS/MS)
Source: Royal Society of Chemistry journal article supplement (doi:10.1039/d3ja00190c), 2023-01-01
Supplement: d3ja00190c1.xlsx [file d3ja00190c1.xlsx]

## Sheet: Table S1
Table S1. Determination results for Ag in each geological RMs by ICP-MS/MS
Samples	Ag (107-107)	2 sd	Ag (107-141)	2 sd	Ag (109-109)	2 sd	Ag (109-143)	2 sd
	ng g-1		ng g-1		ng g-1		ng g-1
TDB-1
1	162.161		157.345		157.712		154.711
2	163.46		148.282		147.899		146.486
3	155.213		147.491		147.839		145.798
4	168.33		160.827		157.626		159.622
Mean	162.291	10.8295	153.486	13.257	152.769	11.3161	151.654	13.3586
WGB-1
1	47.5502		44.4233		43.0854		46.8222
2	44.3327		42.6132		43.1901		41.8516
3	44.6801		42.5669		45.3252		42.8362
Mean	45.521	3.53185	43.2011	2.1174	43.8669	2.52808	43.8367	5.264
BE-N
1	38.8324		37.4948		37.6412		35.3495
2	37.6278		37.0639		36.3179		35.6258
3	37.4519		37.9887		37.2702		33.4619
4	39.0645		37.8074		37.3785		32.6471
Mean	38.2441	1.64381	37.5887	0.80998	37.1519	1.15487	34.2711	2.89609
UB-N
1	47.3997		43.8742		41.1976		42.8727
2	50.0932		44.7908		45.9665		46.6277
Mean	48.7465	3.80921	44.3325	1.29625	43.5821	6.74432	44.7502	5.31042
JA-2
1	35.3394		30.5433		33.9684		32.0616
2	33.4114		32.505		30.8673		35.5627
3	34.3571		32.5654		31.5629		31.6522
4	37.9605		33.4083		32.5135		31.8405
Mean	35.2671	3.92106	32.2555	2.42727	32.228	2.68436	32.7792	3.7263
JB-3
1	54.7893		64.1997		49.9594		50.337
2	57.1496		53.9317		52.5963		50.4115
3	54.2705		51.8221		53.0444		56.0609
4	57.3847		53.0227		52.8254		50.1442
Mean	55.8985	3.19477	55.7441	11.4059	52.1064	2.88592	51.7384	5.76773
MUH-1
1	12.3177		10.0399		11.0975		11.338
2	13.5434		14.3279		13.9306		11.7021
3	7.55354		7.98691		6.36626		7.19879
Mean	11.1382	6.32867	10.7849	6.47093	10.4648	7.64331	10.0796	5.003
OKUM
1	3.93796		3.58314		4.11859		3.17328
2	4.11339		4.87865		4.55696		4.01231
3	4.82669		4.46192		4.80442		4.47257
Mean	4.29268	0.941425	4.3079	1.32269	4.49332	0.694635	3.88605	1.31757
AGV-2
1	55.1252		57.6182		54.568		54.4971
2	54.4252		54.6155		53.5685		49.6132
3	54.0228		54.1336		53.1486		47.5063
4	56.3484		54.5894		49.3621		50.2471
5	52.6557		54.7469		50.9611		49.1688
Mean	54.5155	2.72782	55.1407	2.8084	52.3217	4.23027	50.2065	5.20875
BCR-2
1	34.9059		31.7451		32.5077		31.7077
2	31.0261		32.1274		30.951		30.4822
3	32.3369		34.5097		32.6181		32.5589
4	31.6331		34.9927		33.0165		30.8977
5	32.7334		31.4375		28.7876		29.4746
Mean	32.5271	2.96474	32.9625	3.31977	31.5762	3.49212	31.0242	2.35234
BHVO-2
1	41.743		46.7748		42.8778		44.7263
2	48.2242		45.6105		46.2719		42.1465
3	46.7774		45.4425		45.9319		43.5078
4	45.0109		46.5523		42.996		44.9884
Mean	45.4389	5.58479	46.095	1.33256	44.5194	3.66645	43.8422	2.60325
BIR-1a
1	31.417		29.3811		29.157		27.8733
2	31.5373		28.3161		28.2256		27.8071
3	31.0107		27.4239		29.4069		27.5969
Mean	31.3217	0.551932	28.3737	1.95971	28.9298	1.24502	27.7591	0.288676
GSP-2
1	86.1291		84.8091		81.6565		81.3395
2	98.2633		97.4709		89.1923		90.7219
3	85.7571		83.8272		81.707		78.2988
4	81.0571		82.7677		80.3405		79.2689
Mean	87.8016	14.693	87.2187	13.7709	83.2241	8.05759	82.4073	11.3726
GSR-1
1	13.9577		14.6509		14.8942		13.1392
2	16.0965		13.2915		14.467		14.0505
3	16.48		15.5264		14.3004		13.1881
4	14.2254		13.955		15.5356		13.4709
Mean	15.1899	2.56511	14.356	1.91506	14.7993	1.1018	13.4621	0.837159
GSR-2
1	63.1659		60.3824		60.3439		57.9175
2	67.9779		60.5644		55.0535		55.066
3	57.9586		63.6863		57.5183		55.7645
4	60.5022		63.341		60.2785		54.4457
Mean	62.4012	8.56562	61.9935	3.52506	58.2985	5.0653	55.7984	3.02388
GSR-3
1	28.6247		28.0144		24.7992		23.2322
2	29.5419		27.142		26.3155		24.7306
3	27.8304		27.9747		26.3963		23.9829
4	30.2106		26.8519		25.1822		24.7005
Mean	29.0519	2.08404	27.4958	1.17654	25.6733	1.60842	24.1615	1.41885
GSR-4
1	58.2818		56.2709		58.4754		52.3666
2	55.9162		54.3221		52.2321		51.8791
3	54.0992		55.1176		53.5566		50.6981
4	56.6165		58.1766		55.2005		55.4658
Mean	56.2284	3.46375	55.9718	3.34704	54.8662	5.3903	52.6024	4.06681
GSR-5
1	33.341		31.9368		31.5629		30.422
2	32.7319		34.5233		31.5675		28.7179
3	33.8111		34.6764		32.5631		30.9387
4	33.0263		36.079		34.2479		29.6859
Mean	33.2276	0.923464	34.3039	3.45275	32.4853	2.53142	29.9411	1.928
GSR-6
1	26.296		27.4761		25.3233		25.5821
2	28.9964		29.1017		27.9247		26.6472
3	31.1196		33.5852		28.2572		27.0291
Mean	28.804	4.83504	30.0543	6.32796	27.1684	3.21307	26.4195	1.49975
